# Supplementary material for: Exploring the Impact of an Innovative Peer Role-Play Simulation to Cultivate Student Pharmacists’ Motivational Interviewing Skills
Source: MDPI journal article supplement (doi:10.3390/pharmacy11040122), 2023-07-29
Supplement: s1 [file s1]

**Motivational Interviewing Peer Role-play Grading Rubric**

|                                                                                                                                                                                                    | <b>Ratings Point Allocation</b>                                                             |                                                                                                                  |                                                                                                                                                                                                                          |                                                                                                                                                                                     |                                                                                                                                                             |                     |
|----------------------------------------------------------------------------------------------------------------------------------------------------------------------------------------------------|---------------------------------------------------------------------------------------------|------------------------------------------------------------------------------------------------------------------|--------------------------------------------------------------------------------------------------------------------------------------------------------------------------------------------------------------------------|-------------------------------------------------------------------------------------------------------------------------------------------------------------------------------------|-------------------------------------------------------------------------------------------------------------------------------------------------------------|---------------------|
| <b>Criteria</b>                                                                                                                                                                                    | <b>3</b>                                                                                    | <b>2</b>                                                                                                         | <b>1</b>                                                                                                                                                                                                                 | <b>0.5</b>                                                                                                                                                                          | <b>0</b>                                                                                                                                                    | <b>Total Points</b> |
| Student Pharmacist:<br>Employs principle of <b>patient autonomy</b> .<br>Reassures patient that they are in control (slides 13 and 23)                                                             | <b>X</b>                                                                                    | <b>X</b>                                                                                                         | <b>Fully Achieved</b><br>Consistently emphasizes patient autonomy                                                                                                                                                        | <b>Partially Achieved</b><br>Sometimes challenges patient autonomy or exerts authority                                                                                              | <b>Not achieved</b><br>Consistently challenges patient autonomy or exerts authority                                                                         | <b>1</b>            |
| Student Pharmacist:<br><b>Expresses empathy</b> .<br>Expresses emotional and/or cognitive empathy using paraphrasing (slides 12, 15, 17, 19); Summarizes ambivalence using paraphrasing (slide 21) | <b>Fully Achieved</b><br>Consistently expresses empathy using multiple counseling practices | <b>Mostly Achieved</b><br>In most cases, expresses empathy effectively using multiple counseling practices       | <b>Partially Achieved</b><br>Frequently misses opportunities to express empathy, struggles with one or more counseling practices, or uses formulations that are mildly judgmental of patient's choices and circumstances | <b>X</b>                                                                                                                                                                            | <b>Not Achieved</b><br>Consistently misses opportunities to express empathy or uses formulations that are judgmental of patient's choices and circumstances | <b>3</b>            |
| Student Pharmacist:<br><b>Develops discrepancy</b> .<br>Provides opportunity for the patient to talk about distance between current state and goal state (slide 21)                                | <b>X</b>                                                                                    | <b>X</b>                                                                                                         | <b>Fully Achieved</b><br>Consistently helps patient develop discrepancy when opportunities arise                                                                                                                         | <b>Partially Achieved</b><br>Helps to develop discrepancy in some ways, but uses authority to assert that the goal state is far away or uses formulation(s) that are not open-ended | <b>Not Achieved</b><br>Does not help patient develop discrepancy                                                                                            | <b>1</b>            |
| Student Pharmacist:<br>Enhances patient's <b>self-efficacy</b> .<br>Helps patient build confidence through change talk, including possible sources of                                              | <b>X</b>                                                                                    | <b>Fully Achieved</b><br>Consistently creates opportunities for the patient to engage in change talk that builds | <b>Partially Achieved</b><br>Enhances self efficacy in most opportunities but doesn't consistently encourage the patient to be the one to voice their own confidence                                                     | <b>X</b>                                                                                                                                                                            | <b>Not Achieved</b><br>Consistently misses opportunities to enhance patient's self-efficacy                                                                 | <b>2</b>            |

|                                                                                                                                                                                           |   |                                              |                                                                                                                                                                                                                                |                                                                                                                                                                                                              |                                                                                                                                                                                        |    |
|-------------------------------------------------------------------------------------------------------------------------------------------------------------------------------------------|---|----------------------------------------------|--------------------------------------------------------------------------------------------------------------------------------------------------------------------------------------------------------------------------------|--------------------------------------------------------------------------------------------------------------------------------------------------------------------------------------------------------------|----------------------------------------------------------------------------------------------------------------------------------------------------------------------------------------|----|
| social/professional support (slides 22, 23, 24, 25)                                                                                                                                       |   | confidence and identifies sources of support |                                                                                                                                                                                                                                |                                                                                                                                                                                                              |                                                                                                                                                                                        |    |
| Student Pharmacist:<br><b>Rolls with resistance</b><br>When faced with patient resistance, is non-confrontational, shifts the topic, and/or emphasizes patient autonomy (slide 13 and 23) | X | X                                            | <b>Fully Achieved</b><br>Consistently avoids confrontation and/or redirects the conversation when resistance emerges; guides patient without asserting authority/expertise                                                     | <b>Partially Achieved</b><br>Attempts to avoid confrontation or debate, but uses formulations that could invite patient to resist even more (dig in their heels)                                             | <b>Not Achieved</b><br>Is confrontational or attempts to argue, debate, or correct the patient excessively                                                                             | 1  |
| Patient: <b>Prepares well</b><br>to describe symptoms and life circumstances with accuracy and realism                                                                                    | X | X                                            | <b>Fully Achieved</b><br>Appears familiar with the flow of the timeline and is fully prepared to describe asthma symptoms and life circumstances; speaks conversationally, avoiding excessively short speaking turns           | <b>Partially Achieved</b><br>Appears moderately well-prepared but misses some key speaking turns in the timeline and/or doesn't describe symptoms accurately or life circumstances with realism/authenticity | <b>Not Achieved</b><br>Appears poorly prepared to provide appropriate portrayal of the patient; performance hinders partner's ability to practice Motivational Interviewing principles | 1  |
| Patient: <b>Presents a balanced challenge</b> for partner using reasonable resistance and change talk                                                                                     | X | X                                            | <b>Fully Achieved</b><br>Consistently provides a reasonable and balanced challenge, resisting appropriately as directed and engaging in change talk when student pharmacist uses effective Motivational Interviewing practices | <b>Partially Achieved</b><br>Mostly provides a balanced challenge for the student pharmacist but is occasionally excessively difficult or excessively easy                                                   | <b>Not Achieved</b><br>Provides an excessively difficult or excessively easy encounter; performance hinders partner's ability to practice Motivational Interviewing principles         | 1  |
| Total Points                                                                                                                                                                              |   |                                              |                                                                                                                                                                                                                                |                                                                                                                                                                                                              |                                                                                                                                                                                        | 10 |
