# Supplementary material for: Exploring the Impact of an Innovative Peer Role-Play Simulation to Cultivate Student Pharmacists’ Motivational Interviewing Skills
Source: Pharmacy (Basel). 2023 Jul 29;11(4):122. doi: 10.3390/pharmacy11040122 (PMC10458726; doi:10.3390/pharmacy11040122)
Supplement: Supplementary file 1 [file pharmacy-11-00122-s001.zip]

Archive with 4 entries (4 files):
- Document S1-Asthma and Medication Primer.pdf
- PowerPoint Slides S1-Turn-by-turn action script .pptx
- Table S1-Formulation challenges in motivational interviewing.pdf
- Table S2-MI role-play grading rubric.pdf
